# Supplementary material
Source: publisher figshare collection journal article supplement (https://acs.figshare.com/ndownloader/files/14816798)
Supplement: Supplementary file 1 [file 14816798]

# SUPPORTING INFORMATION TO THE MANUSCRIPT

## Exposure to air pollution inside electric and diesel-powered passenger trains

Maria Helena G. Andersen<sup>1,2\*</sup>, Sandra Johannesson<sup>3</sup>, Ana Sofia Fonseca<sup>2</sup>, Per Axel Clausen<sup>2</sup>, Anne Thoustrup Saber<sup>2</sup>, Martin Roursgaard<sup>1</sup>, Katrin Loeschner<sup>4</sup>, Ismo K. Koponen<sup>2</sup>, Steffen Loft<sup>1</sup>, Ulla Vogel<sup>2,5</sup>, Peter Møller<sup>1</sup>

<sup>1</sup>Department of Public Health, Section of Environmental Health, University of Copenhagen, Øster Farimagsgade 5A, DK-1014 Copenhagen K, Denmark; <sup>2</sup>The National Research Centre for the Working Environment, Lersø Parkalle 105, DK-2100 Copenhagen Ø, Denmark; <sup>3</sup>Department of Occupational and Environmental Medicine, Sahlgrenska Academy at University of Gothenburg, 40530 Gothenburg, Sweden; <sup>4</sup>National Food Institute, Technical University of Denmark, DK-2800 Kgs. Lyngby, Denmark; <sup>5</sup>Department of Health Technology, Technical University of Denmark, DK-2800 Kgs. Lyngby, Denmark; \*Corresponding author: mhar@sund.ku.dk; mga@nfa.dk.

### Content summary:

The Supporting Information contains 14 pages. It includes 9 tables, 8 figures and one section of method details for metal content analysis from particle matter.

| Tables   | Title                                                                                                                                                     | Page   |
|----------|-----------------------------------------------------------------------------------------------------------------------------------------------------------|--------|
| Table S1 | Overview of sampling                                                                                                                                      | SI. 2  |
| Table S2 | Train schedules in the three scenarios                                                                                                                    | SI. 3  |
| Table S3 | Exposure parameters, instruments, resolution, sampling flow, sampling period and sampling sites                                                           | SI. 3  |
| Table S4 | Time series data and data loss                                                                                                                            | SI. 8  |
| Table S5 | Results from particle-bound and gas phase PAHs analysis, presented in air concentrations (ng/m <sup>3</sup> )                                             | SI. 9  |
| Table S6 | Results from elemental analysis of acid extracts from particulate matter collected with the electrostatic sampler and SRM 2975                            | SI. 10 |
| Table S7 | Gradient levels summary of BC mass concentration (µg/m <sup>3</sup> ) measured with MicroAeth inside the train in scenario “diesel A” (all day)           | SI. 12 |
| Table S8 | Gradient levels summary of UFP number concentration (particles/cm <sup>3</sup> ) measured with DiscMini inside the train in scenario “diesel A” (all day) | SI. 12 |
| Table S9 | Underground train platform measurements of black carbon mass concentration (BC) and particle number concentration (UFP)                                   | SI. 13 |

| Figures   | Caption                                                                                                                                          | Page   |
|-----------|--------------------------------------------------------------------------------------------------------------------------------------------------|--------|
| Figure S1 | Sequence attached to the pump for the collection of particles on filters for PAH content analysis                                                | SI. 4  |
| Figure S2 | Compartment in front of the first passenger car in the diesel train.                                                                             | SI. 4  |
| Figure S3 | Time-series data from pilot study for Diesel A                                                                                                   | SI. 5  |
| Figure S4 | Time series from Electric scenario with (a) total particle number concentration, and (b) particle number size distributions measured by NanoScan | SI. 6  |
| Figure S5 | Time series from Diesel A scenario with (a) total particle number concentration, and (b) particle number size distributions measured by NanoScan | SI. 6  |
| Figure S6 | Daily temporal variation of 10 minutes averages UFP number concentration from NanoTracer                                                         | SI. 7  |
| Figure S7 | Time-series (from 08:30 to 09:59) data from black carbon mass concentration measured on underground train platform                               | SI.13  |
| Figure S8 | Time-series (from 08:30 to 09:59) data from ultrafine particles number concentration measured on underground train platform                      | SI. 14 |

**Table S1** – Overview of sampling

| Week | Date                    | Description                                      | Devices and samplers                                                   |
|------|-------------------------|--------------------------------------------------|------------------------------------------------------------------------|
| 1    | 7-8 March 2017          | Pilot study<br>(electric and diesel A scenarios) | DM, NT and NanoScan SMPS                                               |
| 2    | 16-18 May 2017          | Electric scenario                                | BC, NT, NO <sub>x</sub> /NO <sub>2</sub> , Aldehydes                   |
| 3    | 6-8 June 2017           | Diesel A scenario                                | BC, NT, NO <sub>x</sub> /NO <sub>2</sub> , Aldehydes                   |
| 4    | 27-29 June 2017         | Diesel A scenario                                | BC, NT, NO <sub>x</sub> /NO <sub>2</sub> , Aldehydes                   |
| 5    | 1-3 August 2017         | Diesel A scenario                                | BC, DM, NT, NO <sub>x</sub> /NO <sub>2</sub> , Aldehydes               |
| 6    | 8-10 August 2017        | Diesel A scenario                                | BC, DM, NT, NO <sub>x</sub> /NO <sub>2</sub> , Aldehydes               |
| 7    | 15-17 August 2017       | Electric scenario                                | BC, DM, NT, NO <sub>x</sub> /NO <sub>2</sub> , Aldehydes               |
| 8    | 22-24 August 2017       | Electric scenario                                | BC, DM, NT, NO <sub>x</sub> /NO <sub>2</sub> , Aldehydes               |
| 9    | 29-31 August 2017       | Diesel A scenario                                | BC, DM, NT, NO <sub>x</sub> /NO <sub>2</sub> , Aldehydes               |
| 10   | 5-7 September 2017      | Diesel A scenario                                | BC, DM, NT, NO <sub>x</sub> /NO <sub>2</sub>                           |
| 11   | 12-14 September 2017    | Diesel A scenario                                | BC, DM, NT, NO <sub>x</sub> /NO <sub>2</sub>                           |
| 12   | 19-21 September 2017    | Electric scenario                                | BC, DM, NT, NO <sub>x</sub> /NO <sub>2</sub> , Aldehydes               |
| 13   | 26-28 September 2017    | Diesel A scenario                                | BC, DM, NT, NO <sub>x</sub> /NO <sub>2</sub> , Aldehydes               |
| 14   | 3-5 October 2017        | Diesel B scenario                                | BC, DM, NT, NO <sub>x</sub> /NO <sub>2</sub> , PM <sub>2.5</sub> , PAH |
| 15   | 10-12 October 2017      | Diesel B scenario                                | BC, DM, NT, NO <sub>x</sub> /NO <sub>2</sub> , PM <sub>2.5</sub> , PAH |
| 16   | 17-19 October 2017      | Electric scenario                                | BC, DM, NT, NO <sub>x</sub> /NO <sub>2</sub> , PM <sub>2.5</sub> , PAH |
| 17   | 24-26 October 2017      | Electric scenario                                | BC, DM, NT, NO <sub>x</sub> /NO <sub>2</sub> , PM <sub>2.5</sub> , PAH |
| 18   | 31 Oct.-2 November 2017 | Electric scenario                                | BC, DM, NT, NO <sub>x</sub> /NO <sub>2</sub> , PM <sub>2.5</sub> , PAH |
| 19   | 7-9 November 2017       | Diesel B scenario                                | BC, DM, NT, NO <sub>x</sub> /NO <sub>2</sub> , PM <sub>2.5</sub> , PAH |
| 20   | 14-16 November 2017     | Diesel B scenario                                | BC, DM, NT, NO <sub>x</sub> /NO <sub>2</sub> , PM <sub>2.5</sub> , PAH |
| 21   | 21-23 November 2017     | Diesel B scenario                                | BC, DM, NT, NO <sub>x</sub> /NO <sub>2</sub> , PM <sub>2.5</sub> , PAH |
| 22   | 28-30 November 2017     | Diesel B scenario                                | BC, DM, NT, NO <sub>x</sub> /NO <sub>2</sub> , PM <sub>2.5</sub> , PAH |
| 23   | 5-7 December 2017       | Diesel A scenario/Gradient                       | BC, DM, NT, Electrostatic sampler                                      |
| 24   | 12-14 December 2017     | Diesel A scenario/Gradient                       | BC, DM, NT, Electrostatic sampler                                      |
| 25   | 26 January 2018         | Underground station with ME                      | BC, DM                                                                 |
| 26   | 2 February 2018         | Underground station without ME                   | BC, DM                                                                 |

DM, DiscMini; NT, NanoTracer; BC, Black carbon; PAH, polycyclic aromatic hydrocarbons; ME, diesel locomotive Litra ME; Gradient, exposure gradient measurements performed on 6, 7 and 13 of December 2017.

**Table S2** – Train schedules in the three scenarios

| Scenario      | Diesel A                                                                                | Diesel B                                                                              | Electric                                                                                                                                    |
|---------------|-----------------------------------------------------------------------------------------|---------------------------------------------------------------------------------------|---------------------------------------------------------------------------------------------------------------------------------------------|
| Route         | ØS-Kb-CS-Ho-CS                                                                          | ØS-Ho-CS-Kb-CS                                                                        | ØS-Els-ØS                                                                                                                                   |
| Schedule      | ØS 8:34 – Kb 10:10<br>Kb 10:46 – CS 12:12<br>CS 13:27 – Ho 14:25<br>Ho 14:35 – CS 15:32 | ØS 8:34 – Ho 9:28<br>Ho 9:35 – CS 10:32<br>CS 10:45 – Kb 12:10<br>Kb 12:46 – CS 14:12 | ØS 9:39 – Els 10:17<br>Els 10:38 – ØS 11:16<br>ØS 11:39 – Els 12:17<br>Els 12:38 – ØS 13:16<br>ØS 13:39 – Els 14:17<br>Els 14:38 – ØS 15:16 |
| Resume        | 6h 47min<br>(4h 46 min, 36 stops +<br>2h01min waiting time)                             | 5h 59min<br>(4h 53min, 39 stops + 56min<br>waiting time)                              | 5h 37 min<br>(3h 48min, 42 stops + 1h 49min<br>waiting time)                                                                                |
| Sampling days | 31 days                                                                                 | 18 days                                                                               | 22 days                                                                                                                                     |

ØS, Østerport station; Kb, Kalundborg station; CS, Copenhagen Central station; Ho, Holbæk station; Els, Elsinore station.

**Table S3** – Exposure variables, instruments, resolution, sampling flow, sampling period and sampling sites

| Variable                                         | Instrument                     | Resolution              | Sampling flow                        | Sampling period             | Sampling site                   |
|--------------------------------------------------|--------------------------------|-------------------------|--------------------------------------|-----------------------------|---------------------------------|
| UFP number concentration and size distribution   | NanoTracer (10-300 nm)         | 16 sec                  | 0.3-0.4 L/min                        | 23 weeks (70 days)          | On-board trains and on platform |
|                                                  | DiSCmini (10-300 nm)           | 1 sec                   | 1.0 L/min                            | 21 weeks + 2 days (65 days) | On-board trains and on platform |
|                                                  | NanoScan SMPS (10-420 nm)      | 1 min                   | 0.75 L/min                           | 2 days                      | On-board trains                 |
| Black Carbon                                     | MicroAeth AE51                 | 1 min                   | 150 mL/min                           | 23 weeks (69 days)          | On-board trains and on platform |
| NO <sub>2</sub> and NO <sub>x</sub> <sup>1</sup> | Ogawa samplers                 | Accumulated over 3 days | Passive sampling                     | 21 weeks (63 days)          | On-board trains                 |
| Aldehydes <sup>2</sup>                           | Sep-Pak samplers               | Accumulated over 3 days | 200 mL/min (Gilian low flow sampler) | 10 weeks (30 days)          | On-board trains                 |
| PM <sub>2.5</sub>                                | Triplex cyclone teflon filters | Accumulated over 3 days | 1.5 L/min (Apex2IS, USA, Casella)    | 9 weeks (27 days)           | On-board trains                 |
| PAH <sup>3</sup>                                 | Teflon filters and XAD tubes   | Accumulated over 3 days | 1.5 L/min ((Apex2IS, USA, Casella)   | 9 weeks (27 days)           | On-board trains                 |
| Particles                                        | Electrostatic sampler          | Accumulated over 6 days | 3500 L/min                           | 2 weeks (6 days)            | On-board diesel train           |

BC, black carbon; PAH, polycyclic aromatic hydrocarbons; SMPS, scanning mobility particle sizer; UFP, ultrafine particles. <sup>1</sup> Nitrogen oxides analysis was performed at the Division of Occupational and Environmental Medicine, Umeå University, Sweden. <sup>2</sup> Aldehydes were carried out by Occupational and Environmental Medicine at Örebro University Hospital, Sweden. <sup>3</sup> The PAH analysis of collected particles were carried out by the Department of Occupational and Environmental Medicine, Lund University, Sweden; the PAH analysis of collected air samples were carried out by the National Research Centre for the Working Environment, Copenhagen, Denmark.

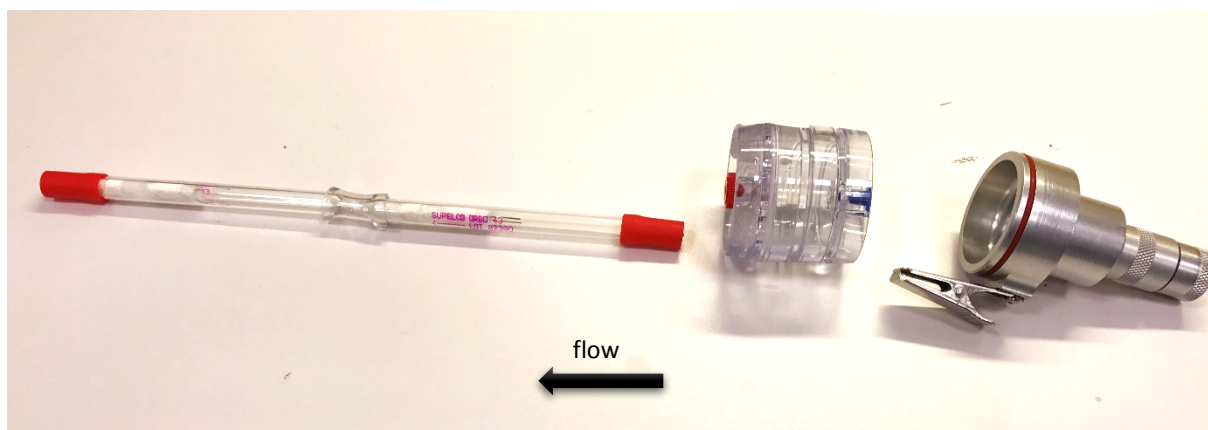

**Figure S1.** Sequence attached to the pump for the collection of particles on filters for PAH content analysis. Two XAD-2 tubes with caps, cassette holding filter and cyclone

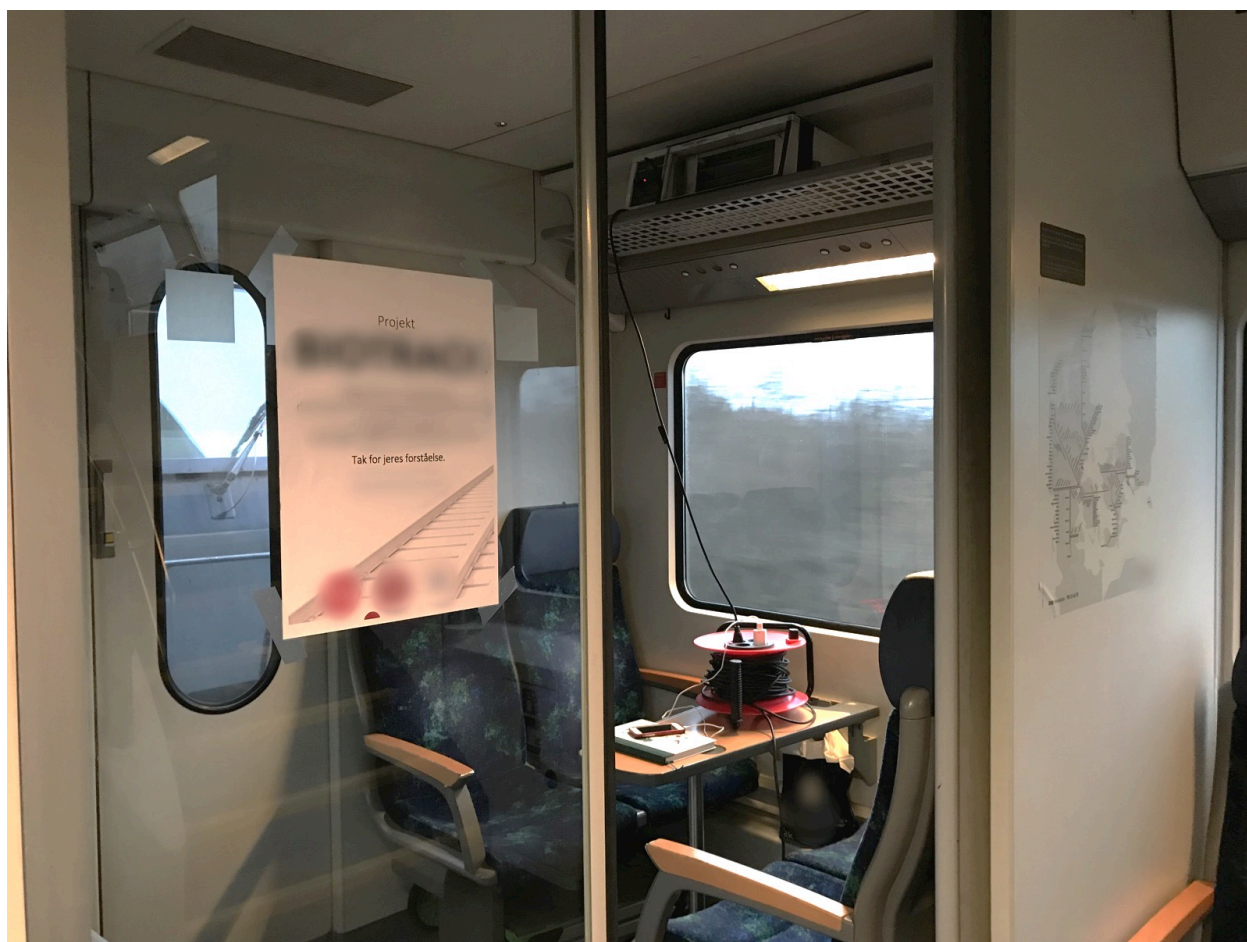

**Figure S2.** Compartment in front of the first passenger car in the diesel train.

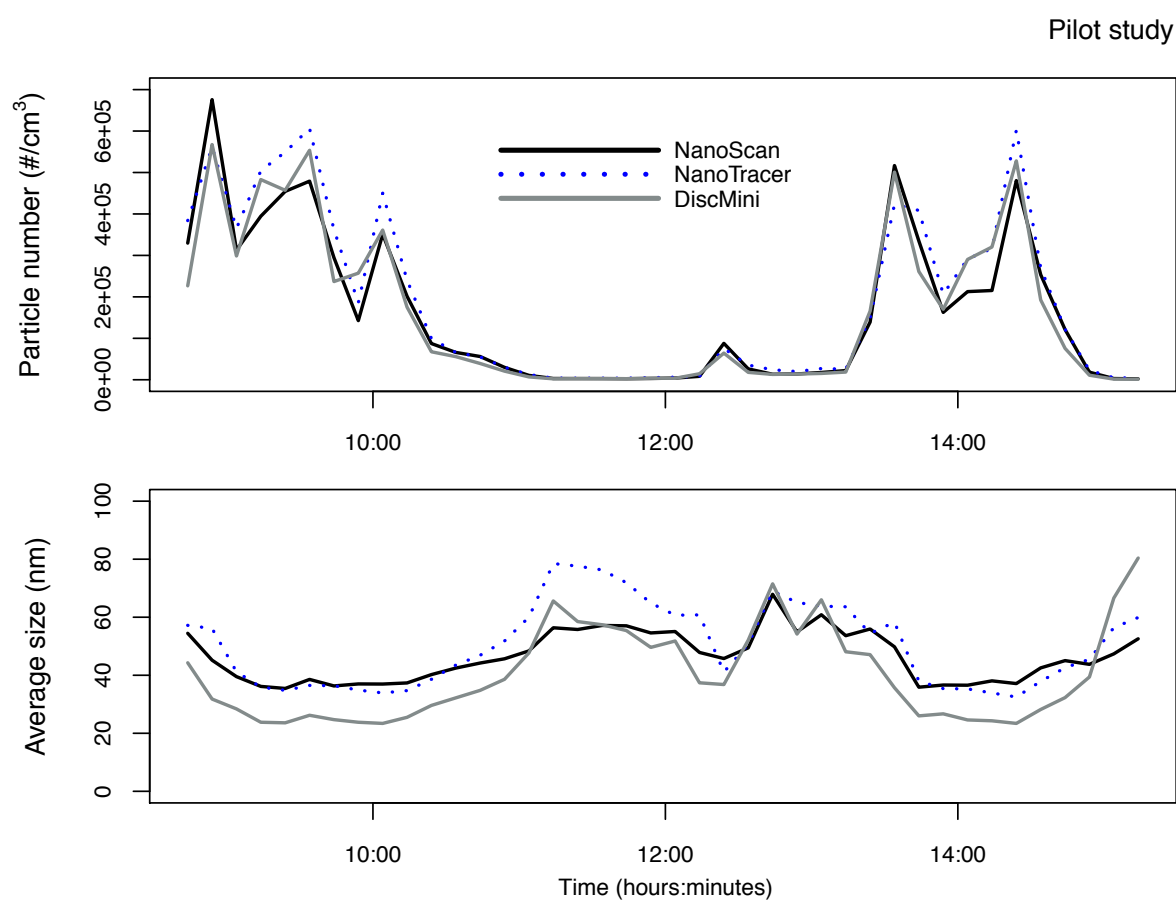

**Figure S3** – Time-series data from pilot study for Diesel A scenario recorded with NanoScan SMPS, NanoTracer and DiscMini on 08-March-2017

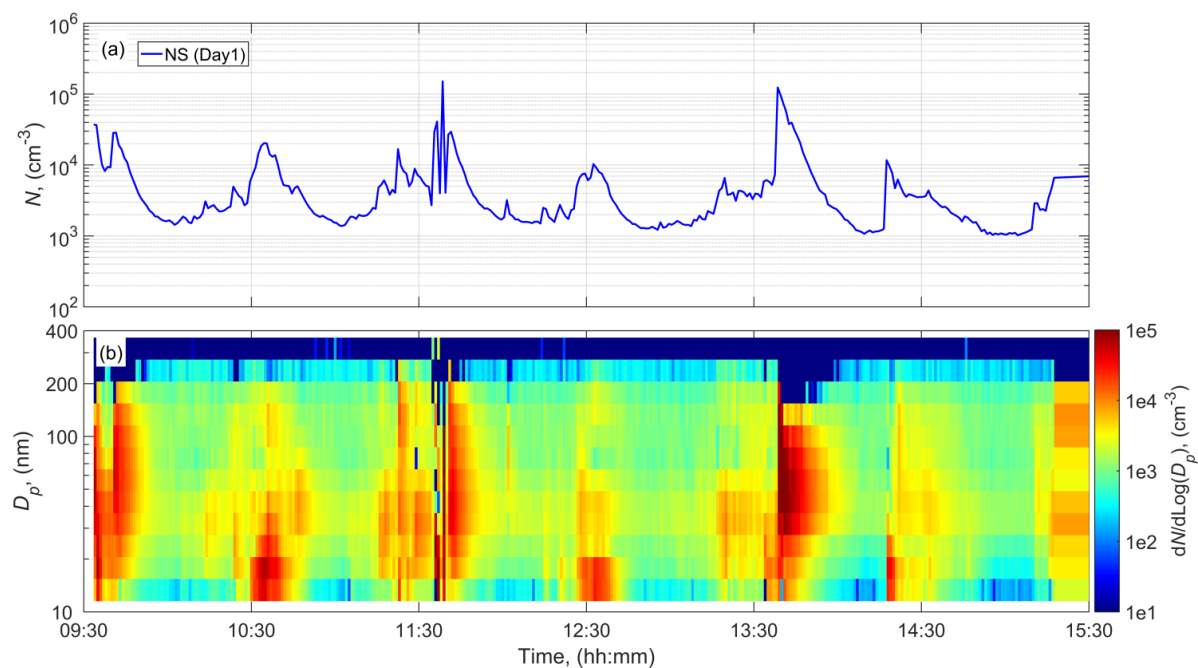

**Figure S4.** Time series from Electric scenario with (a) total particle number concentration, and (b) particle number size distributions measured by NanoScan SMPS (pilot study on 07-March-2017)

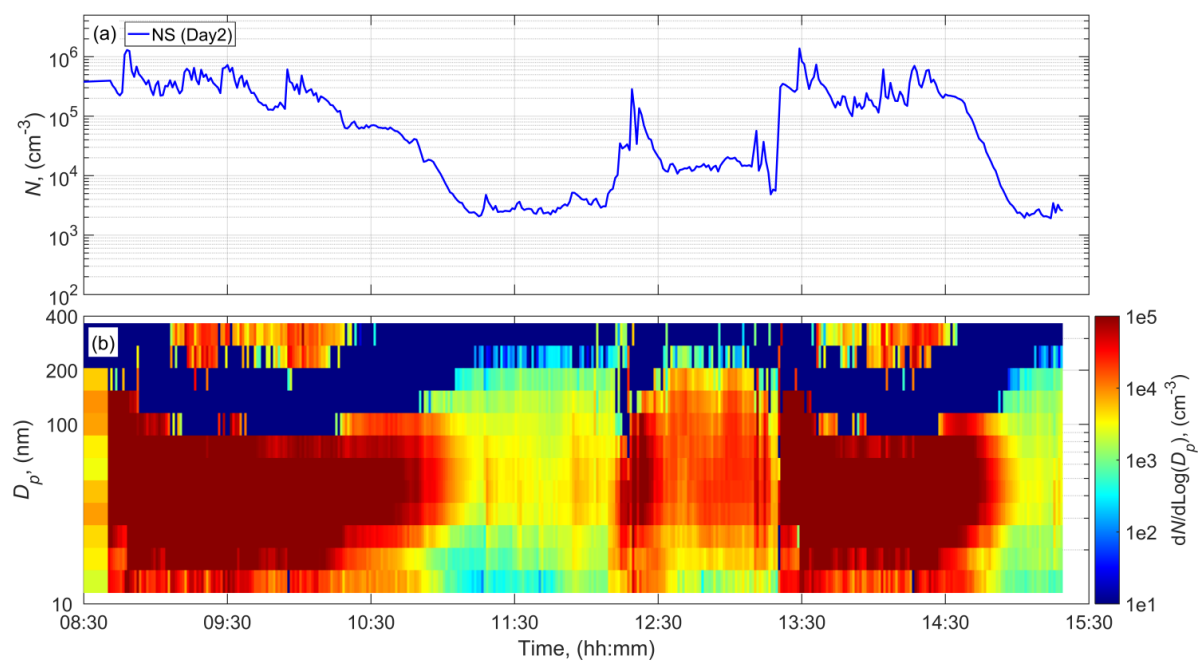

**Figure S5.** Time series from Diesel A scenario with (a) total particle number concentration, and (b) particle number size distributions measured by NanoScan SMPS (pilot study on 08-March-2017)

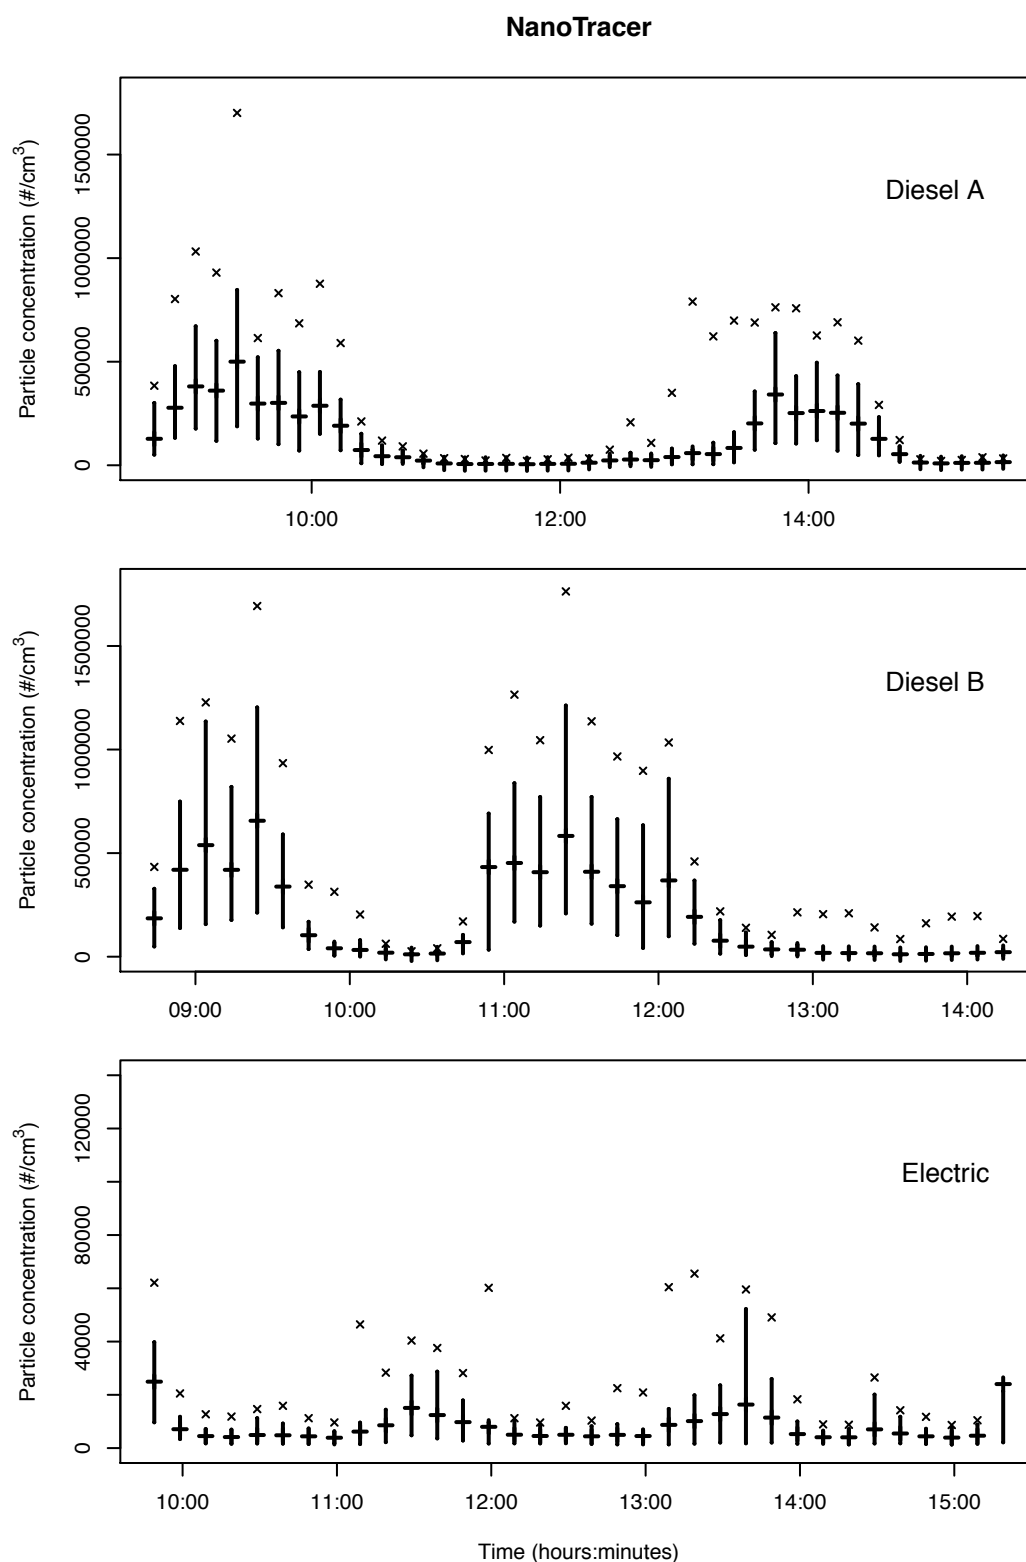

**Figure S6.** Daily temporal variation of 10 minutes averages UFP number concentration (from NanoTracer) in the defined route scenarios (Diesel A, Diesel B and Electric). The symbols represent the arithmetic mean (horizontal lines), the 10<sup>th</sup> to 90<sup>th</sup> percentile distributions (vertical lines) and the maximum values (point crosses) for 10 minutes averaged data. Data results from time series from 29, 18 and 20 measurement days, respectively, for Diesel A, Diesel B and Electric

**Table S4** – Time series data and data loss

|                 | Scenario                       | Black carbon              | Ultrafine particles (DiscMini)                        | Ultrafine particles (Nanotracer) |
|-----------------|--------------------------------|---------------------------|-------------------------------------------------------|----------------------------------|
| <b>Diesel A</b> | Week 1 (1 day) <sup>a)</sup>   | Missing data              | Loss of 5%                                            |                                  |
|                 | Week 3 (3 days)                |                           | Missing data (for 2 days)                             |                                  |
|                 | Week 4 (3 days)                |                           | Missing data (for 3 days)                             | Loss of 10% in 1 day             |
|                 | Week 5 (3 days)                |                           | Missing data (for 1 day)                              |                                  |
|                 | Week 6 (3 days)                |                           | Missing data (for 1 day) and loss of 21% in other day |                                  |
|                 | Week 9 (3 days)                |                           | Missing data (for 1 day) and loss of 5% in 1 day      |                                  |
|                 | Week 10 (3 days)               |                           | Loss of 12% in 1 day                                  |                                  |
|                 | Week 11 (2 days) <sup>b)</sup> |                           |                                                       |                                  |
|                 | Week 13 (2 days) <sup>b)</sup> |                           | Loss of 12% and 10%                                   | Loss of 2% in both days          |
|                 | Week 14 (1 day) <sup>c)</sup>  |                           | Loss of 17%                                           |                                  |
|                 | Week 23 (3 days)               |                           | <sup>d)</sup>                                         | Loss of 3% in 2 days             |
|                 | Week 24 (2 days) <sup>b)</sup> |                           | <sup>d)</sup>                                         | Loss of 10% in 1 day             |
|                 | <b>Total (29 days)</b>         | <b>28 days</b>            | <b>21 days</b>                                        | <b>29 days</b>                   |
| <b>Diesel B</b> | Week 14 (2 days) <sup>c)</sup> |                           |                                                       |                                  |
|                 | Week 15 (3 days)               |                           |                                                       |                                  |
|                 | Week 19 (3 days)               |                           | Loss of 18%, 50% and 30%                              |                                  |
|                 | Week 20 (3 days)               |                           |                                                       |                                  |
|                 | Week 21 (3 days)               |                           |                                                       |                                  |
|                 | Week 22 (3 days)               |                           | Loss of 3% in 1 day                                   |                                  |
|                 | <b>Total (17 days)</b>         | <b>17 days</b>            | <b>17 days</b>                                        | <b>17 days</b>                   |
| <b>Electric</b> | Week 1 (1 day) <sup>a)</sup>   | Missing data              | Missing data                                          | Missing data                     |
|                 | Week 2 (3 days)                |                           | Missing data (for 3 days)                             | Loss of 3% in 1 day              |
|                 | Week 7 (3 days)                |                           |                                                       |                                  |
|                 | Week 8 (3 days)                | Missing data (for 2 days) | Loss of 6% and 12% in 2 days                          | Loss of 12% in 1 day             |
|                 | Week 12 (3 days)               |                           |                                                       |                                  |
|                 | Week 16 (3 days)               |                           | Loss of 6% and 3% in 2 days                           | Loss of 6% in 1 day              |
|                 | Week 17 (3 days)               |                           | Loss of 6%, 12% and 9%                                | Loss of 12% in 1 day             |
|                 | Week 18 (2 days) <sup>b)</sup> |                           | Loss of 9% and 12%                                    | Loss of 12% in both days         |
|                 | <b>Total (21 days)</b>         | <b>18 days</b>            | <b>17 days</b>                                        | <b>20 days</b>                   |

Missing data was due to no availability of devices, failure in flow, no recording mode or lack of battery for more than 50% day monitoring time, and the eventual data fragments were not considered for that day. When data loss (by device failure) was less than 50%, data were included in the analysis.

<sup>a)</sup> Week 1 was the pilot study, with only one day of monitoring in each of the electric and Diesel A scenarios; <sup>b)</sup> Different schedules of trains (cancelation or delay of trips that did not allowed the synchronization and therefore data not considered; <sup>c)</sup> Week 14 was a transition between Diesel A and B scenarios, with 1 day in one and 2 days in the other scenario; <sup>d)</sup> Weeks where we also performed gradient measurements. The devices at other positions than position 1 were briefly disconnected when the train was stopped at stations.



**Table S5** – Results from particle-bound and gas phase PAHs analysis, presented in air concentrations (ng/m<sup>3</sup>)

| Week                       | 14                 | 15                  | 16                 | 17                 | 18                 | 19                 | 20                  | 21                 | 22            |
|----------------------------|--------------------|---------------------|--------------------|--------------------|--------------------|--------------------|---------------------|--------------------|---------------|
| Scenario                   | Diesel             | Diesel              | Electric           | Electric           | Electric           | Diesel             | Diesel              | Diesel             | Diesel        |
| <b>PARTICLE-BOUND PAHs</b> |                    |                     |                    |                    |                    |                    |                     |                    |               |
| Acenaphthylene             | 0.036 <sup>a</sup> | <0.017 <sup>b</sup> | <0.017             | <0.017             | <0.017             | <0.017             | <0.017 <sup>b</sup> | 0.025 <sup>a</sup> | <0.017        |
| Acenaphthene               | 0.030 <sup>a</sup> | <0.057 <sup>b</sup> | <0.057             | <0.057             | 0.14 <sup>a</sup>  | <0.057             | <0.017 <sup>b</sup> | <0.057             | <0.057        |
| Fluorene                   | 0.31 <sup>a</sup>  | <0.021 <sup>b</sup> | <0.021             | <0.021             | 0.094 <sup>a</sup> | 0.040 <sup>a</sup> | <0.021 <sup>b</sup> | <0.021             | <0.021        |
| Phenanthrene               | 0.51               | 0.16 <sup>b</sup>   | <0.14              | <0.14              | 0.26 <sup>a</sup>  | 0.20               | 0.14 <sup>b</sup>   | 0.16 <sup>a</sup>  | <0.14         |
| Fluoranthene               | 0.20               | 0.13 <sup>b</sup>   | <0.051             | <0.051             | <0.051             | 0.20               | 0.10 <sup>b</sup>   | 0.12               | 0.086         |
| Pyrene                     | 0.21               | 0.13 <sup>b</sup>   | 0.02               | 0.03               | 0.016              | 0.20               | 0.10 <sup>b</sup>   | 0.13               | 0.10          |
| Benz(a)anthracene          | 0.085              | 0.088 <sup>b</sup>  | 0.005              | 0.004              | 0.002              | 0.15               | 0.088 <sup>b</sup>  | 0.15               | 0.10          |
| Chrysene                   | 0.063              | <0.057 <sup>b</sup> | <0.057             | <0.057             | <0.057             | 0.17               | 0.059 <sup>b</sup>  | 0.12               | 0.077         |
| Benzo(b)fluoranthene       | 0.18               | 0.17 <sup>b</sup>   | 0.058              | 0.079              | 0.05               | 0.48               | 0.21 <sup>b</sup>   | 0.49               | 0.27          |
| Benzo(k)fluoranthene       | 0.033              | 0.047 <sup>b</sup>  | 0.014              | 0.019              | 0.012              | 0.15               | 0.05 <sup>b</sup>   | 0.14               | 0.083         |
| Benzo(a)pyrene             | 0.081              | 0.10 <sup>b</sup>   | 0.035              | 0.030              | 0.028              | 0.27               | 0.12 <sup>b</sup>   | 0.30               | 0.18          |
| Indeno(1,2,3-cd)pyrene     | 0.079              | 0.090 <sup>b</sup>  | 0.035              | 0.044              | 0.044              | 0.29               | 0.12 <sup>b</sup>   | 0.33               | 0.18          |
| Dibenz(a,h)anthracene      | <0.021             | <0.021 <sup>b</sup> | <0.021             | <0.021             | <0.021             | 0.046              | <0.021 <sup>b</sup> | 0.059              | 0.030         |
| Benzo(g,h,i)perylene       | 0.15               | 0.12 <sup>b</sup>   | 0.045              | 0.047              | 0.052              | 0.32               | 0.15 <sup>b</sup>   | 0.37               | 0.21          |
| <b>ΣPAH filter</b>         | <b>1.90</b>        | <b>1.04</b>         | <b>0.21</b>        | <b>0.25</b>        | <b>0.45</b>        | <b>2.47</b>        | <b>1.14</b>         | <b>2.28</b>        | <b>1.29</b>   |
| <b>GAS PHASE PAHs</b>      |                    |                     |                    |                    |                    |                    |                     |                    |               |
| Naphthalene                | 143.5              | 133.1               | 66.91              | 170.32             | 86.65              | 163.09             | 98.80               | 154.91             | 108.54        |
| Acenaphthene               |                    |                     | 16.94              | 12.47 <sup>a</sup> | 13.97 <sup>a</sup> |                    | 10.47 <sup>a</sup>  | 7.01 <sup>a</sup>  |               |
| Fluorene                   | 11.20 <sup>a</sup> |                     | 9.35               | 8.89 <sup>a</sup>  |                    |                    |                     |                    |               |
| Phenanthrene               | 23.06              | 19.73 <sup>a</sup>  | 16.03              | 15.95              | 16.95              | 24.02 <sup>a</sup> | 8.66 <sup>a</sup>   |                    |               |
| Antracene                  | 9.36               | 5.63                | 20.98 <sup>a</sup> | 4.01               | 5.73               | 5.45               | 3.74 <sup>a</sup>   | 7.52 <sup>a</sup>  |               |
| Fluoranthene               | 57.87              | 6.15                |                    |                    |                    |                    |                     |                    |               |
| Pyrene                     | 21.61              | 6.89                |                    |                    |                    | 8.54 <sup>a</sup>  |                     | 2.50 <sup>a</sup>  | 2.16          |
| <b>ΣPAH XAD-2</b>          | <b>261.12</b>      | <b>161.58</b>       | <b>119.72</b>      | <b>200.96</b>      | <b>116.31</b>      | <b>184.82</b>      | <b>110.24</b>       | <b>163.42</b>      | <b>110.71</b> |

PAH, polycyclic aromatic hydrocarbon; ΣPAH, sum of PAHs. Values only for the PAHs that were detected in at least one sample and presented as averages of duplicate samples, unless specified differently.

<sup>a</sup> value from one of the samples, the other was below limit of detection

<sup>b</sup> value from one sample, the other was eliminated from analysis

**Table S6** – Results from elemental analysis of acid extracts from particulate matter collected with the electrostatic sampler and SRM 2975 (more details of the method are described below)

| Element        | Estimated LOD for the collected particles content (µg/g particle) | Collected particles inside diesel train (µg/g particle) | SRM2975 <sup>a)</sup> (µg/g particle) |
|----------------|-------------------------------------------------------------------|---------------------------------------------------------|---------------------------------------|
| Magnesium (Mg) | 173.9                                                             | 1 664                                                   | 272.5                                 |
| Vanadium (V)   | 13                                                                | ND                                                      | ND                                    |
| Chromium (Cr)  | 6.9                                                               | 105                                                     | 5.5                                   |
| Manganese (Mn) | 4.7                                                               | 439                                                     | 4.5                                   |
| Iron (Fe)      | 603.4                                                             | 44 556                                                  | 589.5                                 |
| Cobalt (Co)    | 0.3                                                               | 5                                                       | 0                                     |
| Nickel (Ni)    | 6.9                                                               | 48                                                      | 4                                     |
| Copper (Cu)    | 2.3                                                               | 1 520                                                   | 18                                    |
| Zinc (Zn)      | 43.7                                                              | 3 388                                                   | 385                                   |
| Gallium (Ga)   | 13                                                                | ND                                                      | ND                                    |
| Arsenic (As)   | 0.3                                                               | 9                                                       | ND                                    |
| Selenium (Se)  | 0.9                                                               | 2                                                       | 1                                     |
| Rubidium (Rb)  | 0.5                                                               | 4                                                       | ND                                    |
| Strontium (Sr) | 4.3                                                               | 119                                                     | ND                                    |
| Silver (Ag)    | < 0.1                                                             | 147                                                     | 0                                     |
| Cadmium (Cd)   | < 0.1                                                             | 1                                                       | ND                                    |
| Indium (In)    | < 0.1                                                             | 0                                                       | 0                                     |
| Caesium (Cs)   | 0.4                                                               | ND                                                      | ND                                    |
| Barium (Ba)    | 4.6                                                               | 63                                                      | 26                                    |
| Mercury (Hg)   | 0.1                                                               | 1                                                       | ND                                    |
| Thallium (Tl)  | 0.1                                                               | ND                                                      | ND                                    |
| Lead (Pb)      | 1.9                                                               | 23                                                      | 12.5                                  |
| Bismuth (Bi)   | 0.1                                                               | 5                                                       | 0                                     |
| Uranium (U)    | 0.1                                                               | ND                                                      | ND                                    |

LOD, limit of detection; ND, not detectable; <sup>a)</sup> values are means of two duplicate analysis.

SRM2975 (Standard Reference Material 2975) was purchased from the National Institute of Standards and Technology (Gaithersburg, MD, USA). SRM2975 consists of diesel exhaust particles collected from an industrial forklift as described in detail elsewhere (<https://www-s.nist.gov/srmors/certificates/2975.pdf>).

**Method details for results in Table S6:**

A volume of 1 mL of 25% (v/v) nitric acid (PlasmaPure 67-69 % HNO<sub>3</sub>, SCP Science, USA) was added to the flask containing 2.35 mg of the particles. Additionally, SRM2975 (diesel particulate matter reference material from the National Institute of Standards) was included in the analysis (N=2). For the preparation of SRM2975, approximately 1 mg of material was weighed into 13 mL polypropylene tubes (Sarstedt, Germany) and 1 mL of 25% (v/v) nitric acid added. The flasks and tubes were transferred to a shaker (Stuart Scientific SF1, UK) and agitated at 600 oscillations per minute overnight. After incubation for approximately 7 hours at room temperature without agitation, the samples were placed in the shaker for another 72 hours and finally transferred with 6 mL of ultrapure water into polypropylene tubes. An empty flask (same type as used to collect the particles) and a polypropylene tube (as used for SRM2975) were treated in the same way as the samples to obtain suitable blank solutions. Before analysis, the samples were centrifuged for 5 minutes at 4500 x g using a centrifuge (Heraeus Multifuge X3 FR, Thermo Scientific, Germany). A volume of 5 mL of the supernatant was transferred to a new polypropylene tube and the samples further diluted 5- or 100-times with 5% HNO<sub>3</sub>.

An inductive coupled plasma mass spectrometer (ICP-MS) (Agilent 8900 ICP-QQQ-MS, Agilent, USA) equipped with a MicroMist borosilicate glass concentric nebulizer and a Scott type double-pass water-cooled spray chamber was run in no gas (Cd, Hg, Pb, Bi, U) or helium (remaining elements) mode with 0.1 - 3 s integration time per mass. The following plasma parameters were used: 1550 W RF power, 15 L/min plasma gas, 0.9 L/min auxiliary gas and 0.99 L/min nebulizer gas. The cell gas flow in helium mode was 5 mL/min. The auto sampler (SPS4, Agilent Technologies) introduced the samples into the ICP-MS with a sample uptake time of 30 s (0.5 rps) and a stabilization time of 30 s (0.1 rps). Quantification was performed based on external calibration (multi-element standards of 5, 10, 25, 50 and 100 µg/L; for mercury 0.5, 1.0, 2.5, 5.0 and 10 µg/L). As quality control, a mixture of 1 µg/L Li, Ba, Bi, V and As was analyzed. Limits of detection for the samples were estimated based on three times the standard deviation of the blanks and taking into account the sample dilution factors.

**Table S7** – Gradient levels summary of black carbon mass concentration ( $\mu\text{g}/\text{m}^3$ ) measured with MicroAeth inside the train in scenario “diesel A” (all day)

|                          | Day 1 (ME 1509) |                | Day 2 (ME 1511) |                | Day 3 (ME 1505) |                |
|--------------------------|-----------------|----------------|-----------------|----------------|-----------------|----------------|
|                          | Position 1      | Position 2 (%) | Position 1      | Position 3 (%) | Position 1      | Position 4 (%) |
| Min                      | 0.3             | 0.4 (133)      | 0.2             | 0.4 (200)      | 0.3             | 0.3 (100)      |
| 1 <sup>st</sup> quartile | 1.1             | 1.3 (118)      | 2.3             | 2.8 (122)      | 1.6             | 1.5 (94)       |
| Median                   | 3.4             | 4.0 (118)      | 5.8             | 5.9 (102)      | 4.9             | 5.2 (106)      |
| Mean                     | 7.2             | 8.1 (113)      | 8.6             | 7.3 (85)       | 13.1            | 7.8 (60)       |
| 3 <sup>rd</sup> quartile | 8.9             | 11.2 (126)     | 12.6            | 9.1 (72)       | 15.7            | 9.7 (62)       |
| Max                      | 66.3            | 59.5 (90)      | 47.8            | 65.1 (136)     | 129.6           | 81.8 (63)      |

Position 1, inside the first passenger compartment closest to the engine in the first car; position 2, just outside the glass that partially separate the first passenger compartment, in the first car; position 3, in the end of the first car; position 4, in the beginning of the second car. A percentage in relation to position 1 is presented for each component of the distribution in the relative positions in the train. The reference code for the ME locomotive engine is presented in parenthesis for each day.

**Table S8** – Gradient levels summary of ultrafine particle number concentration (particles/ $\text{cm}^3$ ) measured with DiscMini inside the train in scenario “diesel A” (all day)

|                          | Day 1 (ME 1509) |                | Day 2 (ME 1511) |                | Day 3 (ME 1505) |                |
|--------------------------|-----------------|----------------|-----------------|----------------|-----------------|----------------|
|                          | Position 1      | Position 2 (%) | Position 1      | Position 3 (%) | Position 1      | Position 4 (%) |
| Min                      | 2 081           | 2 295 (110)    | 1 955           | 1 603 (82)     | 1 782           | 1 338 (75)     |
| 1 <sup>st</sup> quartile | 7 739           | 9 917 (128)    | 39 748          | 56 391 (142)   | 34 515          | 20 761 (60)    |
| Median                   | 80 473          | 84 960 (106)   | 159 914         | 159 955 (100)  | 142 032         | 88 647 (62)    |
| Mean                     | 171 295         | 176 057 (103)  | 343 925         | 270 082 (79)   | 445 183         | 131 732 (30)   |
| 3 <sup>rd</sup> quartile | 267 992         | 296 412 (111)  | 499 046         | 463 666 (93)   | 525 035         | 206 014 (39)   |
| Max                      | 1 360 644       | 966 000 (71)   | 2 003 503       | 1 099 951 (55) | 3 339 889       | 611 748 (18)   |

Position 1, inside the first passenger compartment closest to the engine in the first car; position 2, just outside the glass that partially separate the first passenger compartment, in the first car; position 3, in the end of the first car; position 4, in the beginning of the second car. A percentage in relation to position 1 is presented for each component of the distribution in the relative positions in the train. The reference code for the ME locomotive engine is presented in parenthesis for each day.

**Table S9** – Underground train platform measurements of black carbon mass concentration (BC) and particle number concentration (UFP) on two different days (with and without ME trains in circulation)

|                          | Day 1 (26/01/2018)                               |                          | Day 2 (02/02/2018)                       |                          |
|--------------------------|--------------------------------------------------|--------------------------|------------------------------------------|--------------------------|
|                          | 111 trains (37 ME; 14 other diesel; 60 electric) |                          | 89 trains (20 other diesel; 69 electric) |                          |
|                          | BC ( $\mu\text{g}/\text{m}^3$ )                  | UFP ( $\#/\text{cm}^3$ ) | BC ( $\mu\text{g}/\text{m}^3$ )          | UFP ( $\#/\text{cm}^3$ ) |
| Min                      | 1.9                                              | 24,000                   | 1.5                                      | 8,900                    |
| 1 <sup>st</sup> quartile | 10.1                                             | 111,000                  | 4.4                                      | 19,300                   |
| Median                   | 18.1                                             | 170,000                  | 7.8                                      | 30,800                   |
| Average                  | 24.8                                             | 196,400                  | 11.4                                     | 43,200                   |
| 3 <sup>rd</sup> quartile | 32.9                                             | 244,000                  | 13.6                                     | 50,700                   |
| Max                      | 114.9                                            | 983,600                  | 72.1                                     | 267,800                  |

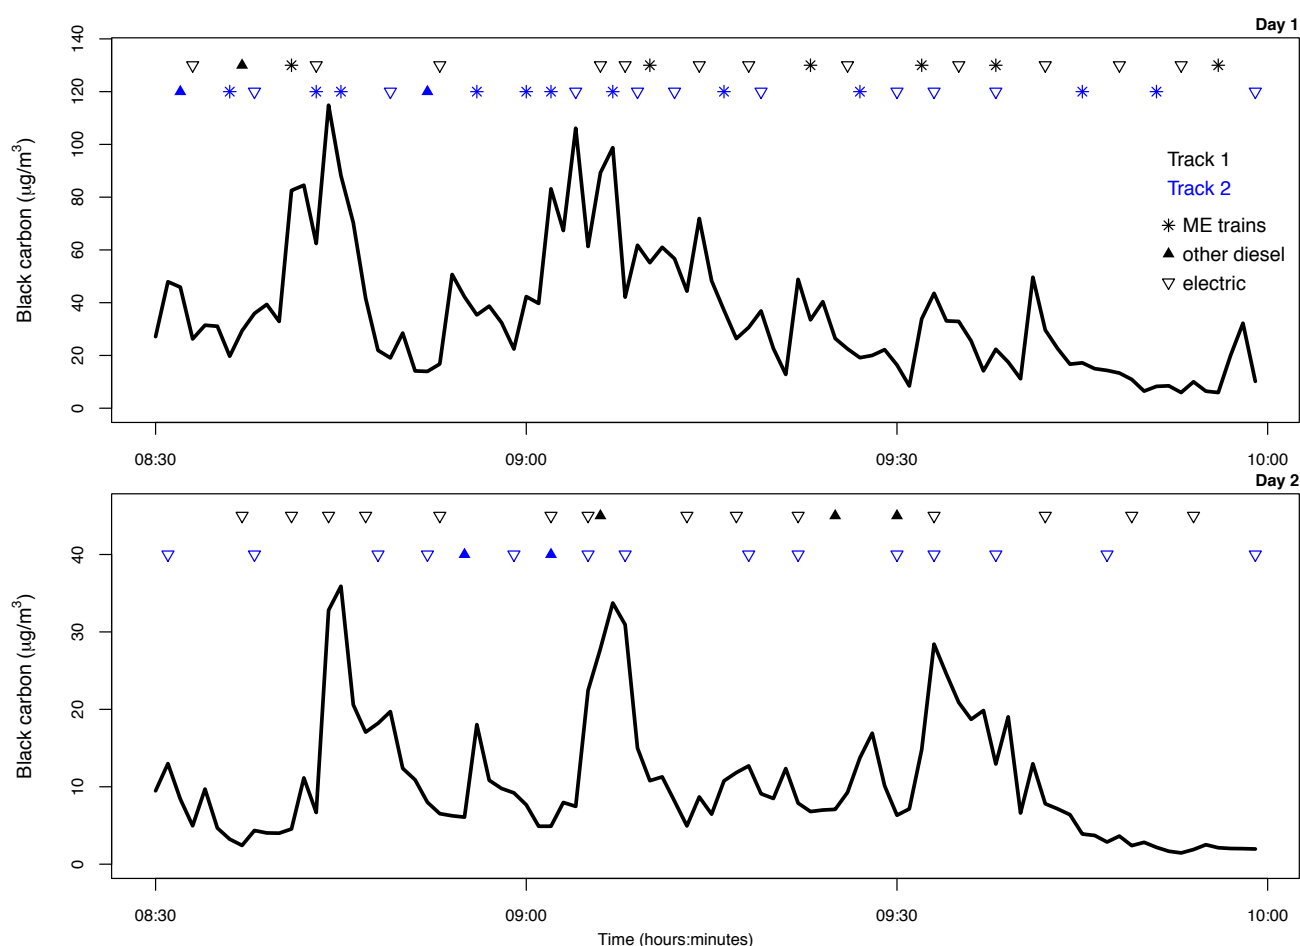

**Figure S7.** Time-series from 08h30 to 09h59 data from black carbon mass concentration measured on underground train platform on two different Fridays, with and without ME trains in circulation. Day 1, with ME trains in circulation and Day 2 without ME trains in circulation. The train passages were recorded as ME trains, other diesel train types and electric trains and distinguished for passages on track 1 (in black) or on track 2 (in blue). Time-series data with 1-minute resolution.

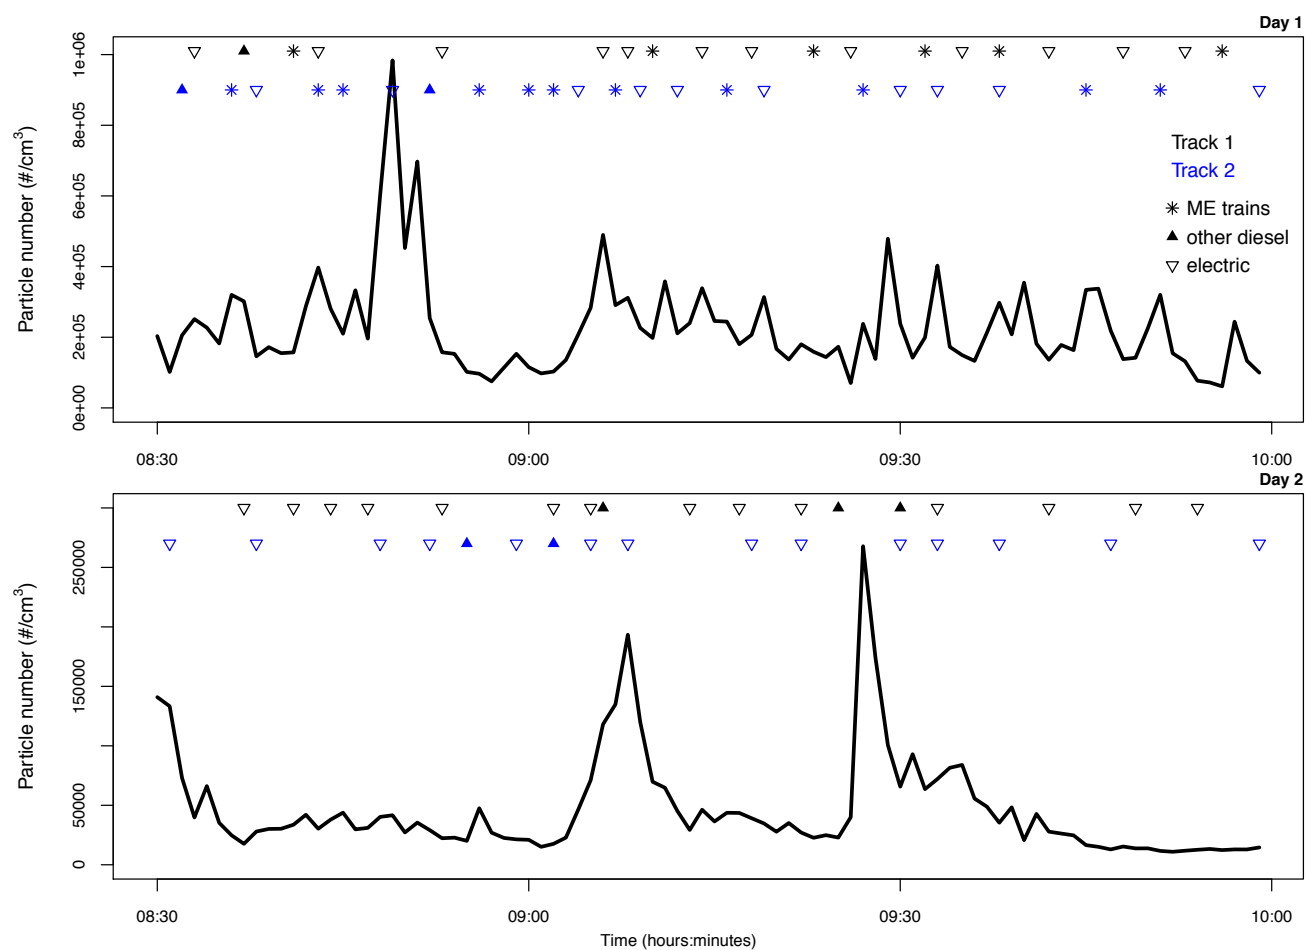

**Figure S8.** Time-series from 08h30 to 09h59 data from ultrafine particles number concentration measured on underground train platform on two different Fridays, with and without ME trains in circulation. Day 1, with ME trains in circulation and Day 2 without ME trains in circulation. The train passages were recorded as ME trains, other diesel train types and electric trains and distinguished for passages on track 1 (in black) or on track 2 (in blue). Time-series data with 1-minute resolution.
